# Supplementary material
Source: MDPI journal article supplement (https://www.mdpi.com/2313-0105/9/11/545)
Supplement: s1 [file s1]

Table S1: Proton conductivity and vanadium permeability of the membranes swollen with a solvent ratio in the range of 4.7-5.3 (the mass ratio of DMF to H<sub>2</sub>O).

| <b>DMF:H<sub>2</sub>O</b>                                           | <b>4.7</b> | <b>4.8</b> | <b>4.9:1</b> | <b>5.0: 1</b> | <b>5.1:1</b> | <b>5.2:1</b> | <b>5.3:1</b> |
|---------------------------------------------------------------------|------------|------------|--------------|---------------|--------------|--------------|--------------|
| Swelling time (hours)                                               | 3          | 3          | 3            | 3             | 3            | 3            | 3            |
| Conductivity (mS.cm <sup>-1</sup> )                                 | 13.3       | 18.5       | 22.06        | 23.53         | 28.0         | 37.76        | 55.75        |
| Permeability (×10 <sup>-6</sup> cm <sup>2</sup> min <sup>-1</sup> ) | /          | 1.16       | 1.22         | 1.84          | 2.47         | 3.10         | /            |
